# Supplementary material
Source: publisher site journal article supplement (https://www.spandidos-publications.com/4080/downloadSupplementary)

Figure S1. Protein-protein interaction network of the protein IL-6 constructed by Search Tool for the Retrieval of Interacting Genes/Proteins analysis (STRING).

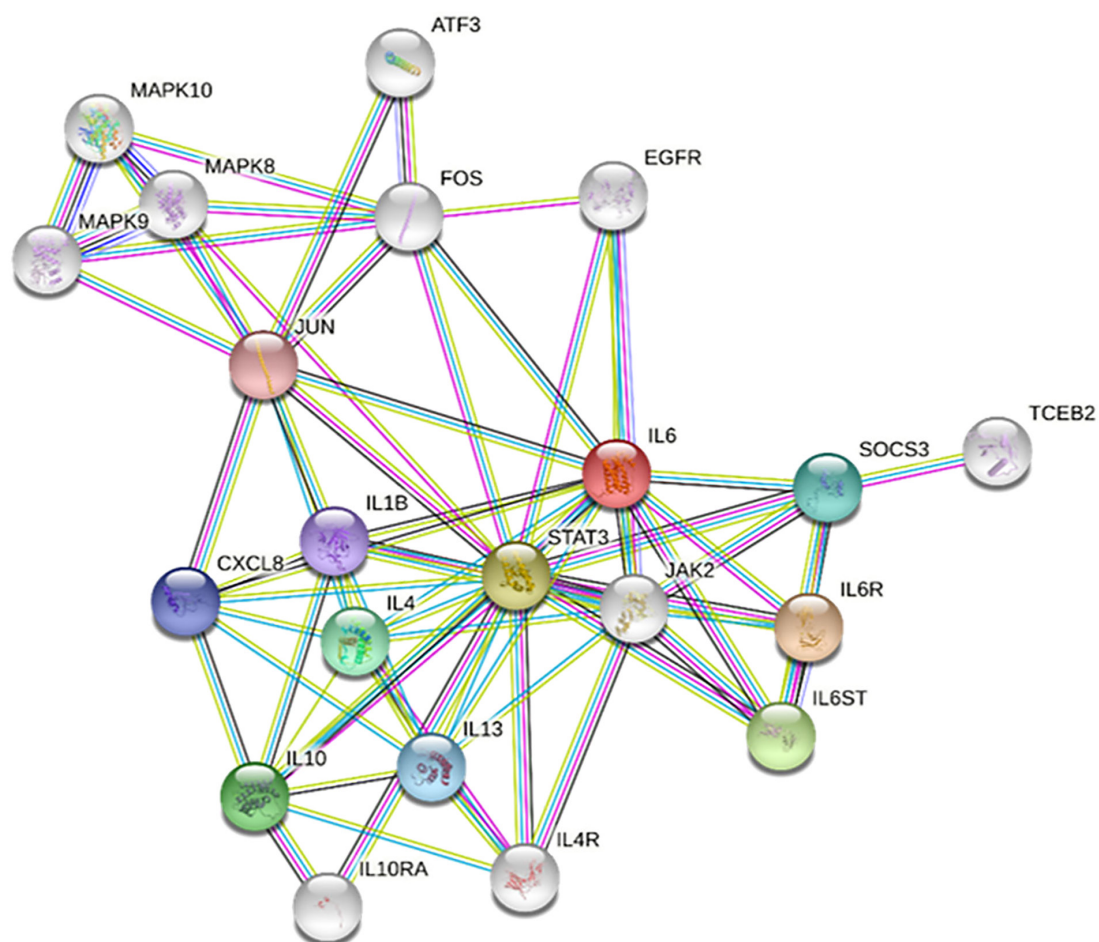

Supplement: Supplementary file 1 [file downloadSupplementary]
